# Supplementary material
Source: PubMed Central journal article supplement (PMC11029311)
Supplement: 262_2014_1537_MOESM1_ESM.pdf [file 262_2014_1537_MOESM1_ESM.pdf]

**Supplementary Table 1:** Clinical characteristics of biopsies used for IHC detection.

| Patient characteristics     | EMCAR <sup>a</sup> patients | US <sup>b</sup> patients |
|-----------------------------|-----------------------------|--------------------------|
| Total                       | 48                          | 47                       |
| Age (years)                 |                             |                          |
| Mean                        | 69,18                       | 60,7                     |
| Range                       | 43-86                       | 26-85                    |
| Type                        |                             |                          |
| Primary                     | 27 (55,1%)                  | 25 (53,2%)               |
| Recurrence                  | 11 (22,9%)                  | 10 (21,3%)               |
| Metastasis                  | 7 (14,3%)                   | 10 (21,3%)               |
| Primary + metastasis        | 3 (6,1%)                    | 1 (2,1%)                 |
| Metastasis + recurrence     | 0 (0,0%)                    | 1 (2,1%)                 |
| FIGO stage <sup>c</sup> ,   |                             |                          |
| I                           | 10 (33,3%)                  |                          |
| II                          | 4 (13,3%)                   |                          |
| III                         | 7 (23,3%)                   |                          |
| IV                          | 9 (30%)                     |                          |
| Differentiation grade       |                             |                          |
| Low                         | 7 (14,3%)                   |                          |
| Moderate                    | 3 (6,1%)                    |                          |
| High                        | 29 (59,2%)                  |                          |
| unknown                     | 9 (18,75%)                  |                          |
| Histologic subtype          |                             |                          |
| Endometrioid                | 16 (32,7%)                  |                          |
| Clear cell                  | 8 (16,3%)                   |                          |
| Serous papillary            | 20 (40,8%)                  |                          |
| Mixed                       | 2 (4,16%)                   |                          |
| Carcinosarcoma              | 2 (4,08%) <sup>d</sup>      | 18 (38,3%)               |
| Leiomyosarcoma              |                             | 12 (25,5%)               |
| Rhabdomyosarcoma            |                             | 6 (12,8%)                |
| Endometrial stromal sarcoma |                             | 7 (14,9%)                |
| Adenosarcoma                |                             | 4 (8,5%)                 |

<sup>a</sup> EMCAR: endometrial carcinoma

<sup>b</sup> US: uterine sarcoma

<sup>c</sup> FIGO stage is given only for primary endometrial carcinoma

<sup>d</sup> Only carcinomatous tumor part included

**Supplementary Table 2:** Clinical characteristics of tissue lysates used for galectin detection.

| Patient characteristics               | EMCAR patients <sup>e</sup> | US patients <sup>f</sup> |
|---------------------------------------|-----------------------------|--------------------------|
| Total                                 | 29                          | 30                       |
| Age (years)                           |                             |                          |
| Mean                                  | 67,1                        | 61                       |
| Range                                 | 48-86                       | 29-83                    |
| FIGO stage (2009)                     |                             |                          |
| I                                     | 9 (31,0%)                   |                          |
| II                                    | 8 (27,6%)                   |                          |
| III                                   | 8 (27,6%)                   |                          |
| IV                                    | 4 (13,8%)                   |                          |
| Differentiation grade (primary tumor) |                             |                          |
| Low                                   | 10 (34,5%)                  |                          |
| Moderate                              | 6 (20,7%)                   |                          |
| High                                  | 13 (44,8%)                  |                          |
| Histologic subtype (primary tumor)    |                             |                          |
| Endometrioid                          | 22 (75,9%)                  |                          |
| Clear cell                            | 3 (10,35%)                  |                          |
| Serous papillary                      | 3 (10,35%)                  |                          |
| Mixed                                 | 1 (3,4%)                    |                          |
| Carcinosarcoma                        |                             | 10 (33,3%)               |
| Leiomyosarcoma                        |                             | 8 (26,6%)                |
| Rhabdomyosarcoma                      |                             | 3 (10%)                  |
| Endometrial stromal sarcoma           |                             | 7 (23,3%)                |
| Unknown                               |                             | 1 (3,3%)                 |
| Ewing sarcoma                         |                             | 1 (3,3%)                 |

<sup>e</sup> EMCAR: endometrial carcinoma

<sup>f</sup> US: uterine sarcoma

**Supplementary Table 3: Galectin-3 expression in primary cancer cell lines**

| Cell line | Histology                  | Grade           | FIGO stage | % positive cells     |                      |
|-----------|----------------------------|-----------------|------------|----------------------|----------------------|
|           |                            |                 |            | gal-3-M <sup>g</sup> | gal-3-C <sup>h</sup> |
| PC-EM-002 | Endometrioid               | 2               | II         | 0.54                 | 85                   |
| PC-EM-005 | Endometrioid               | 3               | II         | 3                    | 98                   |
| PC-EM-012 | Endometrioid               | 2               | IV         | 8                    | 60                   |
| PC-EM-018 | Mixed                      | 3               | Ia         | 0.81                 | 98                   |
| PC-EM-033 | Endometrioid               | 3               | Ia         | 1                    | 99                   |
| PC-EM-046 | Endometrioid               | 3               | Ib         | 5                    | 80                   |
| PC-EM-076 | Endometrioid               | 2               | Ia         | 1,2                  | 99,8                 |
| PC-SAR-25 | Embryonal rhabdomyosarcoma | NA <sup>i</sup> | unknown    | 0,3                  | 99,1                 |

<sup>g</sup> gal-3-M: membranous expression

<sup>h</sup> gal-3-C: cytoplasmic expression

<sup>i</sup> NA: not applicable

**Supplementary Table 4:** Characteristics of tumors used for flow cytometric assessment of galectin-3

| ID | Type  | FIGO stage | Histology      | Grade | Time point |
|----|-------|------------|----------------|-------|------------|
| 13 | EMCAR | IIIc       | serous         | 3     | recurrence |
| 17 | US    | IV         | leiomyosarcoma | 3     | primary    |
| 18 | EMCAR | Ia         | endometrioid   | 1     | primary    |
| 19 | EMCAR | Ia         | endometrioid   | 1     | primary    |
| 22 | US    | Ib         | leiomyosarcoma | 3     | recurrence |
| 24 | EMCAR | Ia         | endometrioid   | 2     | primary    |
| 25 | EMCAR | II         | endometrioid   | 1/2   | primary    |
| 26 | EMCAR | Ia         | endometrioid   | 1     | primary    |
| 27 | EMCAR | Ib         | endometrioid   | 3     | primary    |

**Supplementary Table 5:** Clinical characteristics of tissue lysates used for arginase-1 activity detection.

| Characteristics                    | EMCAR <sup>j</sup> patients | US <sup>k</sup> patients |
|------------------------------------|-----------------------------|--------------------------|
| Total                              | 39                          | 27                       |
| Age (years)                        |                             |                          |
| Mean                               | 67,2                        | 61                       |
| Range                              | 36-86                       | 29-83                    |
| FIGO stage                         |                             |                          |
| I                                  | 10 (25,64%)                 |                          |
| II                                 | 10 (25,64%)                 |                          |
| III                                | 9 (23,08%)                  |                          |
| IV                                 | 10 (25,64%)                 |                          |
| Differentiation grade              |                             |                          |
| Low                                | 8 (20,51%)                  |                          |
| Moderate                           | 4 (10,26%)                  |                          |
| High                               | 17 (43,59%)                 |                          |
| Unknown                            | 10 (25,64%)                 |                          |
| Histologic subtype (primary tumor) |                             |                          |
| Endometrioid                       | 20 (51,3%)                  |                          |
| Clear cell                         | 8 (12,8%)                   |                          |
| Serous papillary                   | 11 (28,2%)                  |                          |
| Mixed                              | 3 (7,7%)                    |                          |
| Carcinosarcoma                     |                             | 9 (33,3%)                |
| Leiomyosarcoma                     |                             | 8 (29,6%)                |
| Rhabdomyosarcoma                   |                             | 2 (7,4%)                 |
| Endometrial stromal sarcoma        |                             | 6 (22,2%)                |
| Unknown                            |                             | 1 (3,75%)                |
| Ewing sarcoma                      |                             | 1 (3,75%)                |

<sup>j</sup> EMCAR: endometrial carcinoma

<sup>k</sup> US: uterine sarcoma

**Supplementary Table 6:** Characteristics of tumors used for MDSC infiltration and arginase-1 expression by MDSC

| ID | Type  | FIGO stage | Histology               | Grade | Time point | MDSC frequency | MDSC arginase-1 |
|----|-------|------------|-------------------------|-------|------------|----------------|-----------------|
| 5  | EMCAR | Ia         | endometrioid            | 1     | primary    | yes            | no              |
| 9  | EMCAR | IIIa       | mixed serous-clear cell | 3     | primary    | yes            | no              |
| 10 | EMCAR | Ib         | endometrioid            | 1     | primary    | yes            | yes             |
| 11 | EMCAR | Ia         | endometrioid            | 1     | primary    | yes            | yes             |
| 14 | EMCAR | Ib-II      | endometrioid            | 3     | primary    | yes            | yes             |
| 17 | US    | IV         | leiomyosarcoma          | 3     | primary    | no             | yes             |
| 18 | EMCAR | Ia         | endometrioid            | 1     | primary    | no             | yes             |
| 19 | EMCAR | Ia         | endometrioid            | 1     | primary    | no             | yes             |
| 22 | US    | Ib         | leiomyosarcoma          | 3     | recurrence | no             | yes             |
| 24 | EMCAR | Ia         | endometrioid            | 2     | primary    | yes            | yes             |
| 25 | EMCAR | II         | endometrioid            | 1/2   | primary    | yes            | yes             |
| 26 | EMCAR | Ia         | endometrioid            | 1     | primary    | yes            | yes             |
| 27 | EMCAR | Ib         | endometrioid            | 3     | primary    | yes            | yes             |
| 28 | US    | IV         | myxoid                  |       | primary    | yes            | yes             |

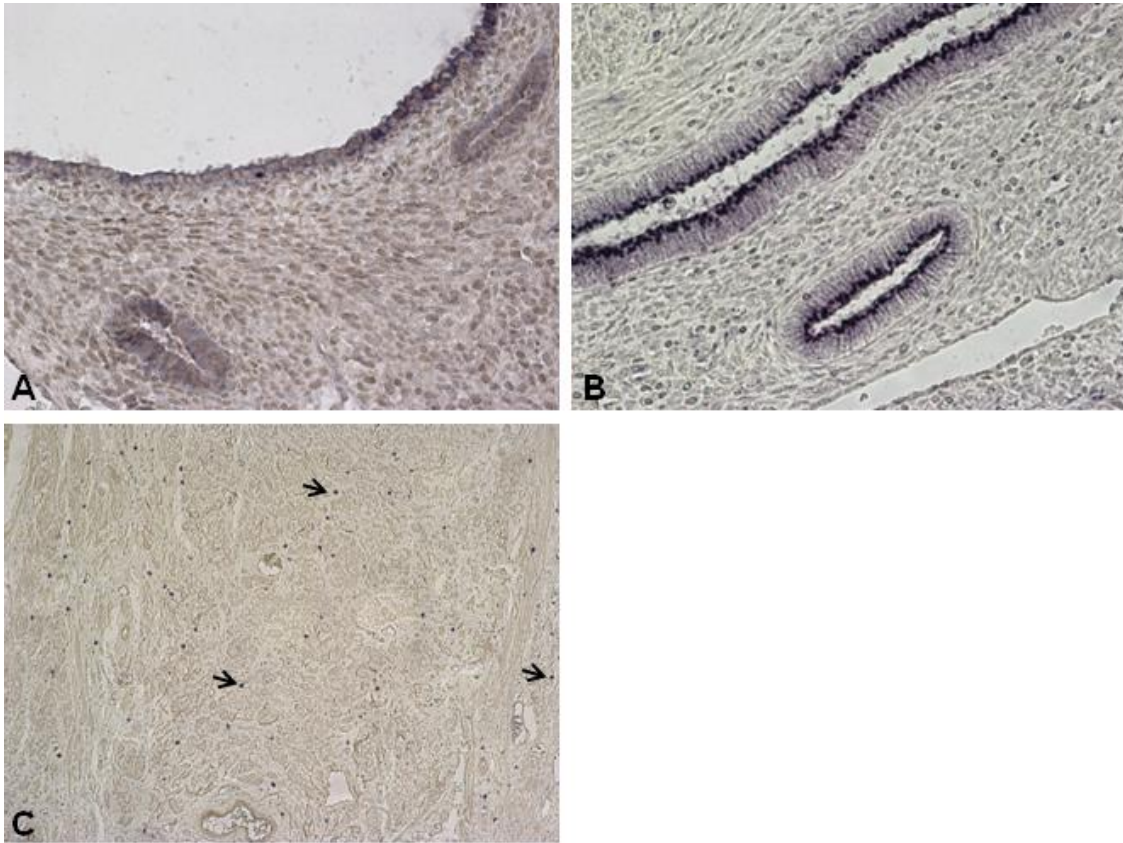

**Supplemental Figure 1: IDO expression in endometrial biopsies.** A. normal endometrium with moderate (intensity score 2) expression levels of IDO (40x enlarged). B. normal endometrium with clear apical IDO expression at high expression level (intensity score 3, 40x enlarged). C. endometrial carcinoma biopsy with numerous infiltrating cells in the tumor stroma (black arrows, 10x enlarged).

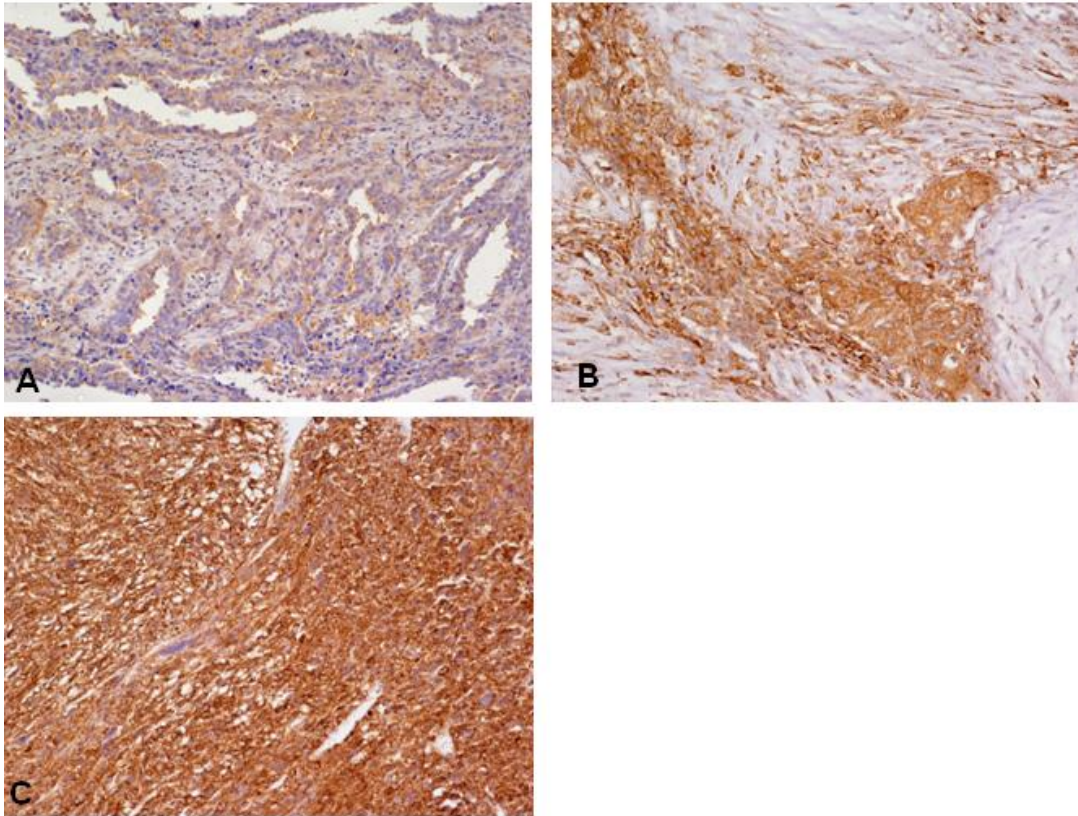

**Supplemental Figure 2: PD-L1 expression in endometrial biopsies.** A. endometrial carcinoma biopsy showing weak expression (intensity score 1, 20x enlarged). B. endometrial carcinoma expressing moderate (intensity score 2) PD-L1 levels (20x enlarged). C. high PD-L1 expression levels in uterine sarcoma (20x enlarged). High expression can clearly be seen on the cell membrane (top of picture).



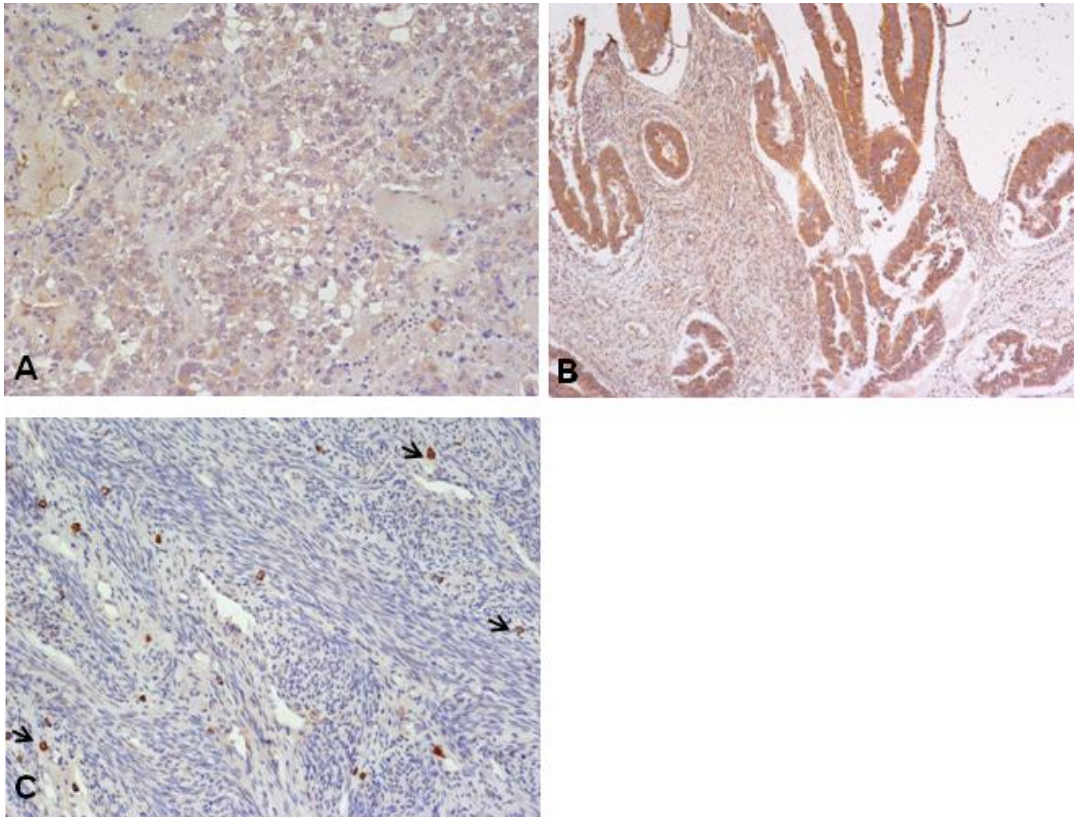

**Supplemental Figure 3: PD-L2 expression in endometrial biopsies.** Endometrial carcinoma samples showing A. weak expression (20x enlarged) and B. moderate expression level (10x enlarged) of PD-L2. C. representative biopsy showing the presence of PD-L2 positive cells infiltrating the tumor periphery, possibly reflecting the presence of immune cells (20x enlarged).

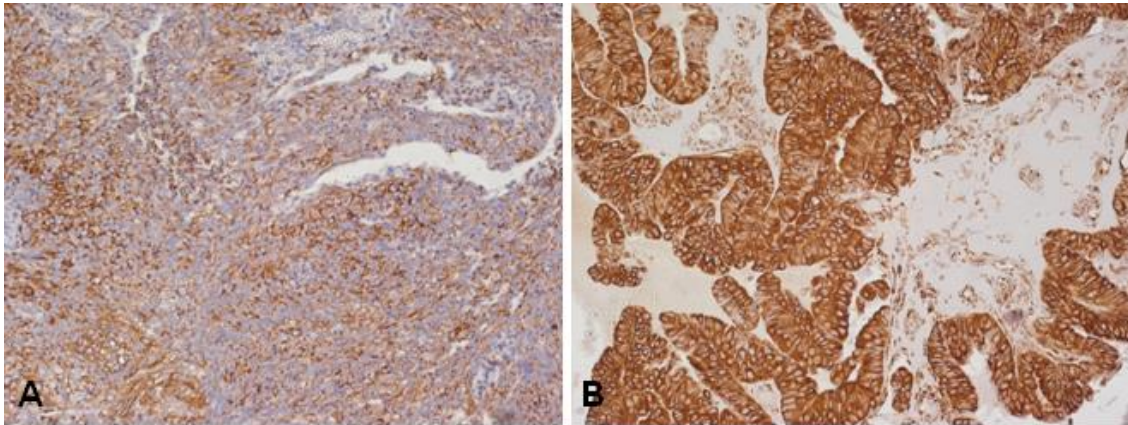

**Supplemental Figure 4: B7-H4 expression in endometrial biopsies.** Endometrial carcinoma biopsies showing A. moderate B7-H4 expression (20x enlarged) and B. strong expression level (20x enlarged) with in addition very clear cytoplasmic and circumferential B7-H4 presence
